# Supplementary material for: Impact of Hemolysis on Multi-OMIC Pancreatic Biomarker Discovery: Derisking Precision Medicine Biomarker Development
Source: Research Square preprint supplement (doi:10.21203/rs.3.rs-593941/v1), 2021-06-10
Supplement: Supplementary file 1 [file 27b8318ce7e4b6d28383fe04.xlsx]

## Sheet: Proteomics buffy coat
Supplemental Table 1: Differential expressed proteins in Buffy Coat due to hemolysis
Uniprot Accesion	adj.P.Val	GeneSymbol	ProteinName	0.378512
Q6ZU65	4.5739e-07	UBN2	Ubinuclein-2
K7ELK0	0.000399464	APLP1	Amyloid-like protein 1 (Fragment)
Q86XP0	3.50434e-05	PLA2G4D	Cytosolic phospholipase A2 delta
Q13702	2.55533e-07	RAPSN	43 kDa receptor-associated protein of the synapse
Q9P0M2	1.02206e-05	AKAP7	A-kinase anchor protein 7 isoform gamma
Q5XPI4	9.85128e-06	RNF123	E3 ubiquitin-protein ligase RNF123
P52732	1.60965e-05	KIF11	Kinesin-like protein KIF11
P56279	0.00203724	TCL1A	T-cell leukemia/lymphoma protein 1A
P35612	3.76882e-07	ADD2	Beta-adducin
O43781	0.00637862	DYRK3	Dual specificity tyrosine-phosphorylation-regulated kinase 3
P59666	3.32827e-05	DEFA3	Neutrophil defensin 3
P15924	0.000383379	DSP	Desmoplakin
O95273	0.000101423	CCNDBP1	Cyclin-D1-binding protein 1
P00915	5.54483e-07	CA1	Carbonic anhydrase 1
P05089	2.09164e-06	ARG1	Arginase-1
Q9Y2F5	0.00957969	KIAA0947;ICE1	Uncharacterized protein KIAA0947
E7EQD2	1.57554e-06	SLC43A3	Solute carrier family 43 member 3
A6NC98.3	0.00619113	CCDC88B	Coiled-coil domain-containing protein 88B
P07738	4.12836e-08	BPGM	Bisphosphoglycerate mutase
Q9NZD4	1.55607e-08	AHSP	Alpha-hemoglobin-stabilizing protein
Q8IZ73	0.00597215	RPUSD2	RNA pseudouridylate synthase domain-containing protein 2
P02042	1.40004e-05	HBD	Hemoglobin subunit delta
Q8WXW3	0.0148287	PIBF1	Progesterone-induced-blocking factor 1
P59665	0.00434102	DEFA1;DEFA1B	Neutrophil defensin 1
P17213	0.00156465	BPI	Bactericidal permeability-increasing protein
P10746	0.0318598	UROS	Uroporphyrinogen-III synthase
Q9Y3B8	0.0151636	REXO2	Oligoribonuclease, mitochondrial
P30613	0.00501559	PKLR	Pyruvate kinase PKLR
Q53GS9	0.0321694	USP39	U4/U6.U5 tri-snRNP-associated protein 2
P20061	0.0296381	TCN1	Transcobalamin-1
O94886	0.00379687	TMEM63A	Transmembrane protein 63A
P49913	0.0123397	CAMP	Cathelicidin antimicrobial peptide
Q96MX0	0.025806	CMTM3	CKLF-like MARVEL transmembrane domain-containing protein 3
P16157	4.64853e-06	ANK1	Ankyrin-1
P32119	0.000193419	PRDX2	Peroxiredoxin-2
P69905	0.00145701	HBA1;HBA2	Hemoglobin subunit alpha
Q7KZI7	0.000102093	MARK2	Serine/threonine-protein kinase MARK2
B4DR63	0.0224678	PSMC1	26S protease regulatory subunit 4
P18065	0.00598701	IGFBP2	Insulin-like growth factor-binding protein 2
Q5TDH0	3.50768e-07	DDI2	Protein DDI1 homolog 2
Q7KZ85	0.00297259	SUPT6H	Transcription elongation factor SPT6
P68871	0.000578003	HBB	Hemoglobin subunit beta
Q9NZJ9	0.0126133	NUDT4	Diphosphoinositol polyphosphate phosphohydrolase 2
P21980	0.0124447	TGM2	Protein-glutamine gamma-glutamyltransferase 2
O14730	0.00153342	RIOK3	Serine/threonine-protein kinase RIO3
P54108	0.0400174	CRISP3	Cysteine-rich secretory protein 3
P14780	0.0337274	MMP9	Matrix metalloproteinase-9
Q9UM07	0.0211447	PADI4	Protein-arginine deiminase type-4
Q6PCE3	0.0450515	PGM2L1	Glucose 1,6-bisphosphate synthase
Q9UHB6	0.00221864	LIMA1	LIM domain and actin-binding protein 1
Q9NRY5	0.000469823	FAM114A2	Protein FAM114A2
P49247	2.48676e-05	RPIA	Ribose-5-phosphate isomerase
P02730	0.00815035	SLC4A1	Band 3 anion transport protein
Q9H8H3	0.0266879	METTL7A	Methyltransferase-like protein 7A
Q96CM4	0.000729367	NXNL1	Nucleoredoxin-like protein 1
Q13228	0.00648642	SELENBP1	Selenium-binding protein 1
P20936	0.00110114	RASA1	Ras GTPase-activating protein 1
Q8WXD5	0.00839676	GEMIN6	Gem-associated protein 6
Q5VTL8	0.0215323	PRPF38B	Pre-mRNA-splicing factor 38B
Q99536	0.00104052	VAT1	Synaptic vesicle membrane protein VAT-1 homolog
P35580	2.48676e-05	MYH10	Myosin-10
Q8WTW3	0.0122967	COG1	Conserved oligomeric Golgi complex subunit 1
O14908	0.00153342	GIPC1	PDZ domain-containing protein GIPC1
P49720	0.000729367	PSMB3	Proteasome subunit beta type-3
Q9P107	0.000289886	GMIP	GEM-interacting protein
P00918	0.000457464	CA2	Carbonic anhydrase 2
Q96T66	3.57839e-06	NMNAT3	Nicotinamide mononucleotide adenylyltransferase 3
Q16512	0.0013873	PKN1	Serine/threonine-protein kinase N1
Q9ULH1	1.60965e-05	ASAP1	Arf-GAP with SH3 domain, ANK repeat and PH domain-containing protein 1
P50876	0.0404364	RNF144A	Probable E3 ubiquitin-protein ligase RNF144A
Q96IZ0	0.00385936	PAWR	PRKC apoptosis WT1 regulator protein
O60869	0.00321383	EDF1	Endothelial differentiation-related factor 1
Q9NZD2	0.00201761	GLTP	Glycolipid transfer protein
P60891	0.00480647	PRPS1	Ribose-phosphate pyrophosphokinase 1
O00391	0.00246648	QSOX1	Sulfhydryl oxidase 1
Q96FJ2	0.000765198	DYNLL2	Dynein light chain 2, cytoplasmic
P54725	0.000147244	RAD23A	UV excision repair protein RAD23 homolog A
Q9Y4E1	0.022451	FAM21C;WASHC2C	WASH complex subunit FAM21C
P00352	0.00407739	ALDH1A1	Retinal dehydrogenase 1
P48507	0.0150168	GCLM	Glutamate--cysteine ligase regulatory subunit
Q9BSL1	0.0116356	UBAC1	Ubiquitin-associated domain-containing protein 1
Q96GG9	0.000216893	DCUN1D1	DCN1-like protein 1
P16402	0.00379077	HIST1H1D	Histone H1.3
P62136	2.71803e-06	PPP1CA	Serine/threonine-protein phosphatase PP1-alpha catalytic subunit
Q9H330	0.00163425	TMEM245	Transmembrane protein 245
P53041	0.014583	PPP5C	Serine/threonine-protein phosphatase 5
P46108	0.00221297	CRK	Adapter molecule crk
P23634	0.00962887	ATP2B4	Plasma membrane calcium-transporting ATPase 4
O43149	8.74219e-05	ZZEF1	Zinc finger ZZ-type and EF-hand domain-containing protein 1
Q9Y371	0.00181777	SH3GLB1	Endophilin-B1
Q9NRW1	0.00681864	RAB6B	Ras-related protein Rab-6B
P51811	0.0137482	XK	Membrane transport protein XK
Q9H4A6	0.00221704	GOLPH3	Golgi phosphoprotein 3
Q16774	0.0239851	GUK1	Guanylate kinase
P12429	0.0132651	ANXA3	Annexin A3
Q9BZH6	0.00409697	WDR11	WD repeat-containing protein 11
Q9Y237	0.00815035	PIN4	Peptidyl-prolyl cis-trans isomerase NIMA-interacting 4
Q8IYI6	6.83912e-06	EXOC8	Exocyst complex component 8
P46976	0.0266879	GYG1	Glycogenin-1
P05114	0.0288829	HMGN1	Non-histone chromosomal protein HMG-14
P11171	0.000300038	EPB41	Protein 4.1
Q8IZ07	0.0148908	ANKRD13A	Ankyrin repeat domain-containing protein 13A
Q86X76	0.00224237	NIT1	Nitrilase homolog 1
P10153	0.00475341	RNASE2	Non-secretory ribonuclease
P61086	0.00156465	UBE2K	Ubiquitin-conjugating enzyme E2 K
O95816	0.00224708	BAG2	BAG family molecular chaperone regulator 2
P30043	0.0142311	BLVRB	Flavin reductase (NADPH)
Q9Y5K6	1.51979e-05	CD2AP	CD2-associated protein
P80723	0.0409576	BASP1	Brain acid soluble protein 1
O43639	0.00102713	NCK2	Cytoplasmic protein NCK2
Q15907	0.000396704	RAB11B	Ras-related protein Rab-11B
O75351	0.000499641	VPS4B	Vacuolar protein sorting-associated protein 4B
P24158	0.00258223	PRTN3	Myeloblastin
P13598	0.0012795	ICAM2	Intercellular adhesion molecule 2
P36959	0.0112073	GMPR	GMP reductase 1
P28072	0.00839676	PSMB6	Proteasome subunit beta type-6
P13797	0.0296565	PLS3	Plastin-3
P25789	0.000283822	PSMA4	Proteasome subunit alpha type-4
Q6P3W7	0.00788335	SCYL2	SCY1-like protein 2
P28799	0.00220285	GRN	Granulins
P61020	0.00123577	RAB5B	Ras-related protein Rab-5B
Q13442	0.000892926	PDAP1	28 kDa heat- and acid-stable phosphoprotein
Q9BV20	0.0162222	MRI1	Methylthioribose-1-phosphate isomerase
P37840	0.00022929	SNCA	Alpha-synuclein
P13716	0.00056623	ALAD	Delta-aminolevulinic acid dehydratase
O14618	0.00240799	CCS	Copper chaperone for superoxide dismutase
P00568	0.00221704	AK1	Adenylate kinase isoenzyme 1
Q9H3K6	0.00401426	BOLA2;BOLA2B	BolA-like protein 2
P08311	0.0211447	CTSG	Cathepsin G
Q9H479	0.0239851	FN3K	Fructosamine-3-kinase
Q9NRX4	0.00156465	PHPT1	14 kDa phosphohistidine phosphatase
P25686	0.000137265	DNAJB2	DnaJ homolog subfamily B member 2
Q96CW1.2	0.000208733	AP2M1	AP-2 complex subunit mu
Q9P1Z2	0.00681864	CALCOCO1	Calcium-binding and coiled-coil domain-containing protein 1
Q9BY44	0.00573854	EIF2A	Eukaryotic translation initiation factor 2A
Q9UNZ2	0.00171287	NSFL1C	NSFL1 cofactor p47
P05204	0.0420118	HMGN2	Non-histone chromosomal protein HMG-17
Q8NG06	0.0207562	TRIM58	Tripartite motif-containing protein 58
Q5TFE4	0.0132689	NT5DC1	5'-nucleotidase domain-containing protein 1
Q9UHV9	0.000551954	PFDN2	Prefoldin subunit 2
Q9UIA9	0.0111461	XPO7	Exportin-7
O75122	0.00619113	CLASP2	CLIP-associating protein 2
Q99961	0.000770293	SH3GL1	Endophilin-A2
P37235	0.000151619	HPCAL1	Hippocalcin-like protein 1
Q13404	0.00788335	UBE2V1	Ubiquitin-conjugating enzyme E2 variant 1
O60925	0.000644801	PFDN1	Prefoldin subunit 1
Q9NT62	0.0266879	ATG3	Ubiquitin-like-conjugating enzyme ATG3
P35573	0.0270174	AGL	Glycogen debranching enzyme
P67775	0.00815035	PPP2CA	Serine/threonine-protein phosphatase 2A catalytic subunit alpha isoform
P00491	9.81487e-05	PNP	Purine nucleoside phosphorylase
P62714	0.0097924	PPP2CB	Serine/threonine-protein phosphatase 2A catalytic subunit beta isoform
Q9P0J7	0.0136281	KCMF1	E3 ubiquitin-protein ligase KCMF1
Q5T4S7	2.36125e-05	UBR4	E3 ubiquitin-protein ligase UBR4
Q9BRF8	0.0224678	CPPED1	Calcineurin-like phosphoesterase domain-containing protein 1
Q92696	0.00179909	RABGGTA	Geranylgeranyl transferase type-2 subunit alpha
P04040	0.0189459	CAT	Catalase
P99999	3.84783e-05	CYCS	Cytochrome c
O75531	0.0092728	BANF1	Barrier-to-autointegration factor
Q16775	0.0132689	HAGH	Hydroxyacylglutathione hydrolase, mitochondrial
Q96CV9	0.00594063	OPTN	Optineurin
P49593	6.17018e-06	PPM1F	Protein phosphatase 1F
P08246	0.0351405	ELANE	Neutrophil elastase
Q9BT78	0.00429357	COPS4	COP9 signalosome complex subunit 4
Q9NR45	0.0221506	NANS	Sialic acid synthase
Q9Y282	0.0112073	ERGIC3	Endoplasmic reticulum-Golgi intermediate compartment protein 3
O14964	3.57839e-06	HGS	Hepatocyte growth factor-regulated tyrosine kinase substrate
Q06124.2	0.00263393	PTPN11	Tyrosine-protein phosphatase non-receptor type 11
P78318	0.0124447	IGBP1	Immunoglobulin-binding protein 1
Q9UBV8	0.00966601	PEF1	Peflin
P43487	0.000569957	RANBP1	Ran-specific GTPase-activating protein
P35813	0.0132689	PPM1A	Protein phosphatase 1A
P63208	0.00205756	SKP1	S-phase kinase-associated protein 1
Q13177	0.000495611	PAK2	Serine/threonine-protein kinase PAK 2
Q9Y4E8	0.00356337	USP15	Ubiquitin carboxyl-terminal hydrolase 15
Q9UK76	0.0357858	HN1;JPT1	Hematological and neurological expressed 1 protein
O95630	0.0124447	STAMBP	STAM-binding protein
P35613	0.0145592	BSG	Basigin
Q9UKL6	0.0497122	PCTP	Phosphatidylcholine transfer protein
O75223	8.91931e-05	GGCT	Gamma-glutamylcyclotransferase
Q8N5M9	0.030675	JAGN1	Protein jagunal homolog 1
P50502	0.00132643	ST13	Hsc70-interacting protein
P27824	0.000966065	CANX	Calnexin
P17980	0.000238741	PSMC3	26S protease regulatory subunit 6A
O75955	0.00132643	FLOT1	Flotillin-1
Q96FS4	0.023095	SIPA1	Signal-induced proliferation-associated protein 1
Q9UK41	0.0130802	VPS28	Vacuolar protein sorting-associated protein 28 homolog
Q04323	0.00937489	UBXN1	UBX domain-containing protein 1
Q9UJ70	0.0396978	NAGK	N-acetyl-D-glucosamine kinase
O43396	0.00304288	TXNL1	Thioredoxin-like protein 1
P10599	0.00126728	TXN	Thioredoxin
Q9HA65	0.0428178	TBC1D17	TBC1 domain family member 17
P00441	0.0390511	SOD1	Superoxide dismutase [Cu-Zn]
P68036	0.00347491	UBE2L3	Ubiquitin-conjugating enzyme E2 L3
Q10567	0.0013873	AP1B1	AP-1 complex subunit beta-1
Q9HA64	0.033871	FN3KRP	Ketosamine-3-kinase
Q9NQP4	0.0245127	PFDN4	Prefoldin subunit 4
Q14254	0.0379322	FLOT2	Flotillin-2
P46379	0.0295828	BAG6	Large proline-rich protein BAG6
P78417	0.0327991	GSTO1	Glutathione S-transferase omega-1
Q13617	0.0181329	CUL2	Cullin-2
Q9H2G2	0.0245867	SLK	STE20-like serine/threonine-protein kinase
P60953	0.0118576	CDC42	Cell division control protein 42 homolog
P40763	0.0236174	STAT3	Signal transducer and activator of transcription 3
P05198	0.0220606	EIF2S1	Eukaryotic translation initiation factor 2 subunit 1
P43034	0.0352565	PAFAH1B1	Platelet-activating factor acetylhydrolase IB subunit alpha
O15400	0.0172656	STX7	Syntaxin-7
P31948	0.00171882	STIP1	Stress-induced-phosphoprotein 1
P26641	0.027952	EEF1G	Elongation factor 1-gamma
P19367	0.0377615	HK1	Hexokinase-1
P41240	0.0347021	CSK	Tyrosine-protein kinase CSK
P25705	0.0114555	ATP5A1;ATP5F1A	ATP synthase subunit alpha, mitochondrial
Q9UBW5	0.0201758	BIN2	Bridging integrator 2
P29350	7.4847e-05	PTPN6	Tyrosine-protein phosphatase non-receptor type 6
P78344	0.0252016	EIF4G2	Eukaryotic translation initiation factor 4 gamma 2
Q6VY07	0.0376025	PACS1	Phosphofurin acidic cluster sorting protein 1
P52907	0.0333489	CAPZA1	F-actin-capping protein subunit alpha-1
Q99798	0.0111461	ACO2	Aconitate hydratase, mitochondrial
Q99733	0.0131936	NAP1L4	Nucleosome assembly protein 1-like 4
P61158	0.00251265	ACTR3	Actin-related protein 3
Q07021	0.0496106	C1QBP	Complement component 1 Q subcomponent-binding protein, mitochondrial
O15145	0.00872206	ARPC3	Actin-related protein 2/3 complex subunit 3
Q16836	0.0112073	HADH	Hydroxyacyl-coenzyme A dehydrogenase, mitochondrial
P40939	0.0111461	HADHA	Trifunctional enzyme subunit alpha, mitochondrial
Q9UHD8	0.0212643	SEPT9;SEPTIN9	Septin-9
P61604	0.0236174	HSPE1	10 kDa heat shock protein, mitochondrial
P43405	0.0141302	SYK	Tyrosine-protein kinase SYK
P14324	0.0291551	FDPS	Farnesyl pyrophosphate synthase
P31946	0.00428115	YWHAB	14-3-3 protein beta/alpha
O60496	0.00738943	DOK2	Docking protein 2
P00338	0.0113796	LDHA	L-lactate dehydrogenase A chain
P38117	0.000345129	ETFB	Electron transfer flavoprotein subunit beta
Q16698	0.0216248	DECR1	2,4-dienoyl-CoA reductase, mitochondrial
Q13043	0.0187235	STK4	Serine/threonine-protein kinase 4
P49591	0.00221297	SARS	Serine--tRNA ligase, cytoplasmic
P60983	0.0404364	GMFB	Glia maturation factor beta
P14625	0.000923709	HSP90B1	Endoplasmin
O60749	0.0287884	SNX2	Sorting nexin-2
P36776	0.00573854	LONP1	Lon protease homolog, mitochondrial
Q13094	0.0225175	LCP2	Lymphocyte cytosolic protein 2
P31146	0.000404418	CORO1A	Coronin-1A
P31749	0.0455398	AKT1	RAC-alpha serine/threonine-protein kinase
P30049	0.0173301	ATP5D;ATP5F1D	ATP synthase subunit delta, mitochondrial
P09110	0.0169076	ACAA1	3-ketoacyl-CoA thiolase, peroxisomal
P51570	0.00221297	GALK1	Galactokinase
P28065	0.0107351	PSMB9	Proteasome subunit beta type-9
Q9P2R7	0.0195389	SUCLA2	Succinyl-CoA ligase [ADP-forming] subunit beta, mitochondrial
Q12906	0.00323186	ILF3	Interleukin enhancer-binding factor 3
Q8NF50	0.000318854	DOCK8	Dedicator of cytokinesis protein 8
P04899	0.000121576	GNAI2	Guanine nucleotide-binding protein G(i) subunit alpha-2
Q9H4M9	0.00172879	EHD1	EH domain-containing protein 1
Q08211	0.003852	DHX9	ATP-dependent RNA helicase A
Q14108	0.028459	SCARB2	Lysosome membrane protein 2
P27797	0.000844347	CALR	Calreticulin
O43181	0.00603691	NDUFS4	NADH dehydrogenase [ubiquinone] iron-sulfur protein 4, mitochondrial
P29590	0.044019	PML	Protein PML
P25325	0.0428178	MPST	3-mercaptopyruvate sulfurtransferase
P08238	1.48354e-06	HSP90AB1	Heat shock protein HSP 90-beta
H7BZJ3	0.0041444	PDIA3	Thioredoxin (Fragment)
Q02218	0.000765198	OGDH	2-oxoglutarate dehydrogenase, mitochondrial
P00367	0.000223617	GLUD1	Glutamate dehydrogenase 1, mitochondrial
Q9Y224	0.0239851	C14orf166;RTRAF	UPF0568 protein C14orf166
O60645	0.0201758	EXOC3	Exocyst complex component 3
P10809	0.000107598	HSPD1	60 kDa heat shock protein, mitochondrial
P09972	0.00730456	ALDOC	Fructose-bisphosphate aldolase C
P27348	0.00110077	YWHAQ	14-3-3 protein theta
P61160	1.1033e-05	ACTR2	Actin-related protein 2
P17987	0.000119252	TCP1	T-complex protein 1 subunit alpha
Q9H3S7	0.0132689	PTPN23	Tyrosine-protein phosphatase non-receptor type 23
P48735	0.000624293	IDH2	Isocitrate dehydrogenase [NADP], mitochondrial
Q9Y4W6	0.021691	AFG3L2	AFG3-like protein 2
P07954	0.000807162	FH	Fumarate hydratase, mitochondrial
Q9ULA0	0.00020335	DNPEP	Aspartyl aminopeptidase
Q9HD20	0.0198359	ATP13A1	Probable cation-transporting ATPase 13A1
P13284	0.0425204	IFI30	Gamma-interferon-inducible lysosomal thiol reductase
Q9UMY4	0.0215323	SNX12	Sorting nexin-12
Q96CX2	0.0425204	KCTD12	BTB/POZ domain-containing protein KCTD12
O60313	0.0083041	OPA1	Dynamin-like 120 kDa protein, mitochondrial
Q5R3A8	0.0346544	FYN	Tyrosine-protein kinase Fyn
P09382	0.00126728	LGALS1	Galectin-1
Q01459	0.023095	CTBS	Di-N-acetylchitobiase
P08754	0.00468645	GNAI3	Guanine nucleotide-binding protein G(k) subunit alpha
Q9NUV9	0.0146367	GIMAP4	GTPase IMAP family member 4
Q9UL18	0.0291012	EIF2C1;AGO1	Protein argonaute-1
Q9NUB1	0.00914557	ACSS1	Acetyl-coenzyme A synthetase 2-like, mitochondrial
Q9HC35	0.021691	EML4	Echinoderm microtubule-associated protein-like 4
Q9UI30	0.00845388	TRMT112	tRNA methyltransferase 112 homolog
Q04941	0.0345637	PLP2	Proteolipid protein 2
Q9H3U1	0.00798885	UNC45A	Protein unc-45 homolog A
P43403	0.014608	ZAP70	Tyrosine-protein kinase ZAP-70
Q9UNH7	2.48676e-05	SNX6	Sorting nexin-6
Q29RF7	0.0460177	PDS5A	Sister chromatid cohesion protein PDS5 homolog A
O60493	0.000522111	SNX3	Sorting nexin-3
Q16576	0.0240539	RBBP7	Histone-binding protein RBBP7
Q9Y295	0.0224286	DRG1	Developmentally-regulated GTP-binding protein 1
Q15438	0.00151801	CYTH1	Cytohesin-1
P14550	0.00652933	AKR1A1	Alcohol dehydrogenase [NADP(+)]
P62906	0.0101822	RPL10A	60S ribosomal protein L10a
P34897	1.80292e-05	SHMT2	Serine hydroxymethyltransferase, mitochondrial
Q13620	0.0158595	CUL4B	Cullin-4B
Q9NZN3	0.016617	EHD3	EH domain-containing protein 3
P52272	0.0021696	HNRNPM	Heterogeneous nuclear ribonucleoprotein M
P06576	0.000575325	ATP5B;ATP5F1B	ATP synthase subunit beta, mitochondrial
P32456	0.0410688	GBP2	Interferon-induced guanylate-binding protein 2
Q07955	0.00347491	SRSF1	Serine/arginine-rich splicing factor 1
P62701	0.00474882	RPS4X	40S ribosomal protein S4, X isoform
Q7Z2W4	2.00473e-05	ZC3HAV1	Zinc finger CCCH-type antiviral protein 1
P30040	3.35271e-06	ERP29	Endoplasmic reticulum resident protein 29
Q13884	0.00872206	SNTB1	Beta-1-syntrophin
P18621	0.00119158	RPL17	60S ribosomal protein L17
O43252	0.0234712	PAPSS1	Bifunctional 3'-phosphoadenosine 5'-phosphosulfate synthase 1
P35237	0.016905	SERPINB6	Serpin B6
Q13838	0.0211447	DDX39B	Spliceosome RNA helicase DDX39B
O14979	0.0128081	HNRNPDL	Heterogeneous nuclear ribonucleoprotein D-like
P48637	0.000522111	GSS	Glutathione synthetase
O75874	5.83622e-08	IDH1	Isocitrate dehydrogenase [NADP] cytoplasmic
P62899	0.00443102	RPL31	60S ribosomal protein L31
P07858	0.00619113	CTSB	Cathepsin B
O95466.2	0.029944	FMNL1	Formin-like protein 1
P13073	0.00151801	COX4I1	Cytochrome c oxidase subunit 4 isoform 1, mitochondrial
O95379	0.00553159	TNFAIP8	Tumor necrosis factor alpha-induced protein 8
P55884	0.000121576	EIF3B	Eukaryotic translation initiation factor 3 subunit B
Q9HCD5	0.00652933	NCOA5	Nuclear receptor coactivator 5
O15355	0.0126653	PPM1G	Protein phosphatase 1G
Q9NZB2	4.09978e-05	FAM120A	Constitutive coactivator of PPAR-gamma-like protein 1
O76071	0.00123577	CIAO1	Probable cytosolic iron-sulfur protein assembly protein CIAO1
P42356	0.00420226	PI4KA	Phosphatidylinositol 4-kinase alpha
A6NDJ8	0.0075616	A6NDJ8	Putative Rab-43-like protein ENSP00000330714
Q14011	2.82314e-05	CIRBP	Cold-inducible RNA-binding protein
P50453	3.57839e-06	SERPINB9	Serpin B9
Q96I99	0.000347105	SUCLG2	Succinyl-CoA ligase [GDP-forming] subunit beta, mitochondrial
P07339	1.2453e-06	CTSD	Cathepsin D
Q8TD55	9.84362e-05	PLEKHO2	Pleckstrin homology domain-containing family O member 2
Q9Y2Z4	0.0144599	YARS2	Tyrosine--tRNA ligase, mitochondrial
Q9NVE7	0.0097924	PANK4	Pantothenate kinase 4
C9JZR7	0.0101181	ACTB	Actin, cytoplasmic 2 (Fragment)
B1AK87	0.000102093	CAPZB	Capping protein (Actin filament) muscle Z-line, beta, isoform CRA_a
O43865	0.00304288	AHCYL1	Putative adenosylhomocysteinase 2
P26572	0.00865936	MGAT1	Alpha-1,3-mannosyl-glycoprotein 2-beta-N-acetylglucosaminyltransferase
Q9Y3Z3	4.46033e-05	SAMHD1	Deoxynucleoside triphosphate triphosphohydrolase SAMHD1
P38919	0.000664951	EIF4A3	Eukaryotic initiation factor 4A-III
Q03519	0.0163066	TAP2	Antigen peptide transporter 2
Q9Y6B6	0.0172656	SAR1B	GTP-binding protein SAR1b
Q8N183	0.0347021	NDUFAF2	Mimitin, mitochondrial
Q9NP97	0.0273349	DYNLRB1	Dynein light chain roadblock-type 1
Q96D71	0.00621672	REPS1	RalBP1-associated Eps domain-containing protein 1
P19404	2.29752e-05	NDUFV2	NADH dehydrogenase [ubiquinone] flavoprotein 2, mitochondrial
P19971	3.75933e-07	TYMP	Thymidine phosphorylase
Q5JRX3	0.00224708	PITRM1	Presequence protease, mitochondrial
P62244	0.0011691	RPS15A	40S ribosomal protein S15a
P80217	2.19684e-05	IFI35	Interferon-induced 35 kDa protein
P55036	0.000245197	PSMD4	26S proteasome non-ATPase regulatory subunit 4
P08648	0.0112073	ITGA5	Integrin alpha-5
Q9Y6I9	0.000303827	TEX264	Testis-expressed sequence 264 protein
P21926	0.00853483	CD9	CD9 antigen
P61966	0.00455688	AP1S1	AP-1 complex subunit sigma-1A
Q96AQ6	0.0308811	PBXIP1	Pre-B-cell leukemia transcription factor-interacting protein 1
Q66K74	0.0271581	MAP1S	Microtubule-associated protein 1S
P56385	0.00203601	ATP5I;ATP5ME	ATP synthase subunit e, mitochondrial
Q9UBQ0	7.80952e-05	VPS29	Vacuolar protein sorting-associated protein 29
P62917	0.0116206	RPL8	60S ribosomal protein L8
O95861	0.0175565	BPNT1	3'(2'),5'-bisphosphate nucleotidase 1
P49189	1.57554e-06	ALDH9A1	4-trimethylaminobutyraldehyde dehydrogenase
P53999	0.000396704	SUB1	Activated RNA polymerase II transcriptional coactivator p15
P51608	0.00345391	MECP2	Methyl-CpG-binding protein 2
Q12972	0.0217823	PPP1R8	Nuclear inhibitor of protein phosphatase 1
P02686	0.000102093	MBP	Myelin basic protein
Q8NDX1	0.00220876	PSD4	PH and SEC7 domain-containing protein 4
O60216	0.000386883	RAD21	Double-strand-break repair protein rad21 homolog
O15533	0.000211651	TAPBP	Tapasin
P43250	2.36125e-05	GRK6	G protein-coupled receptor kinase 6
P62841	0.000710103	RPS15	40S ribosomal protein S15
P23141	0.00487345	CES1	Liver carboxylesterase 1
P63313	0.00130983	TMSB10	Thymosin beta-10
Q9Y2S6	0.000185534	TMA7	Translation machinery-associated protein 7
Q9Y6Y8	5.67542e-06	SEC23IP	SEC23-interacting protein
Q14498	0.0102681	RBM39	RNA-binding protein 39
Q8N257	0.0347021	HIST3H2BB	Histone H2B type 3-B
Q9Y5X3	0.000214792	SNX5	Sorting nexin-5
P57740	4.90569e-05	NUP107	Nuclear pore complex protein Nup107
Q13510	0.014962	ASAH1	Acid ceramidase
O95644	0.001432	NFATC1	Nuclear factor of activated T-cells, cytoplasmic 1
Q6IA17	0.0124447	SIGIRR	Single Ig IL-1-related receptor
Q14289	5.53645e-08	PTK2B	Protein-tyrosine kinase 2-beta
Q8NBL1	0.00429357	POGLUT1	Protein O-glucosyltransferase 1
P50402	2.92541e-08	EMD	Emerin
P50238	0.00648642	CRIP1	Cysteine-rich protein 1
P36507	0.00631785	MAP2K2	Dual specificity mitogen-activated protein kinase kinase 2
P07437	0.000153871	TUBB	Tubulin beta chain
Q92616	1.57554e-06	GCN1L1;GCN1	Translational activator GCN1
Q9Y4Z0	0.00469681	LSM4	U6 snRNA-associated Sm-like protein LSm4
Q96KP4	8.31162e-13	CNDP2	Cytosolic non-specific dipeptidase
P98179	0.000664951	RBM3	Putative RNA-binding protein 3
Q9BPX5	0.00153342	ARPC5L	Actin-related protein 2/3 complex subunit 5-like protein
Q16831	0.00257893	UPP1	Uridine phosphorylase 1
P12004	2.69412e-05	PCNA	Proliferating cell nuclear antigen
P05120	0.000923709	SERPINB2	Plasminogen activator inhibitor 2
Q12904	0.0132689	AIMP1	Aminoacyl tRNA synthase complex-interacting multifunctional protein 1
Q99943	0.00409697	AGPAT1	1-acyl-sn-glycerol-3-phosphate acyltransferase alpha
Q96TC7	5.73343e-05	RMDN3	Regulator of microtubule dynamics protein 3
P14317	0.00738943	HCLS1	Hematopoietic lineage cell-specific protein
Q13595	0.0202142	TRA2A	Transformer-2 protein homolog alpha
Q8N2G8	0.000137265	GHDC	GH3 domain-containing protein
P62995	1.60965e-05	TRA2B	Transformer-2 protein homolog beta
Q13123	0.0281704	IK	Protein Red
P02654	0.000403845	APOC1	Apolipoprotein C-I
Q9UKF6	0.00474882	CPSF3	Cleavage and polyadenylation specificity factor subunit 3
Q8NEY8.6	0.0347021	PPHLN1	Periphilin-1
Q53GQ0	4.5739e-07	HSD17B12	Estradiol 17-beta-dehydrogenase 12
O95140	3.9991e-06	MFN2	Mitofusin-2
Q86U44	0.00937489	METTL3	N6-adenosine-methyltransferase 70 kDa subunit
Q96AT1	0.000280864	KIAA1143	Uncharacterized protein KIAA1143
P62316	2.92985e-10	SNRPD2	Small nuclear ribonucleoprotein Sm D2
Q9NX76	4.54563e-07	CMTM6	CKLF-like MARVEL transmembrane domain-containing protein 6
P50452	0.00225777	SERPINB8	Serpin B8
P00734	0.000966065	F2	Prothrombin
P0C0S5	2.09164e-06	H2AFZ	Histone H2A.Z
Q9UNL2	0.00074413	SSR3	Translocon-associated protein subunit gamma
P32321	0.0141302	DCTD	Deoxycytidylate deaminase
P50914	2.55533e-07	RPL14	60S ribosomal protein L14
Q9UNE7	0.0124447	STUB1	E3 ubiquitin-protein ligase CHIP
P51531	0.00637862	SMARCA2	Probable global transcription activator SNF2L2
Q96JY6	0.000206168	PDLIM2	PDZ and LIM domain protein 2
Q9H4A5	0.0117557	GOLPH3L	Golgi phosphoprotein 3-like
P61421	0.00038655	ATP6V0D1	V-type proton ATPase subunit d 1
Q9NPQ8.4.Q9NPQ8	1.44056e-06	RIC8A	Synembryn-A
Q9NY65.2	2.3453e-09	TUBA8	Tubulin alpha-8 chain
Q9UIQ6	0.000522111	LNPEP	Leucyl-cystinyl aminopeptidase
P02765	0.000267505	AHSG	Alpha-2-HS-glycoprotein
Q9H147	0.00109249	DNTTIP1	Deoxynucleotidyltransferase terminal-interacting protein 1
Q8N131	0.000288026	TMEM123	Porimin
Q14166	2.92541e-08	TTLL12	Tubulin--tyrosine ligase-like protein 12
P17301	0.00223917	ITGA2	Integrin alpha-2
Q8TBX8	0.000892926	PIP4K2C	Phosphatidylinositol-5-phosphate 4-kinase type-2 gamma
P30740	1.59152e-10	SERPINB1	Leukocyte elastase inhibitor
E9PAX8	0.00238282	PPHLN1	Periphilin-1
O43866	0.00914152	CD5L	CD5 antigen-like
P08962	0.00111096	CD63	CD63 antigen
Q58FG1	0.000522111	HSP90AA4P	Putative heat shock protein HSP 90-alpha A4
P02749	5.47863e-05	APOH	Beta-2-glycoprotein 1
P06727	3.08575e-06	APOA4	Apolipoprotein A-IV
B9A064	0.000139046	IGLL5	Immunoglobulin lambda-like polypeptide 5
Q9NY65	9.85128e-06	TUBA8	Tubulin alpha-8 chain
P01031	0.000524515	C5	Complement C5
P01871	0.000121576	IGHM	Ig mu chain C region
P02760	8.91931e-05	AMBP	Protein AMBP
Q9NRY6	0.0019239	PLSCR3	Phospholipid scramblase 3
P02766	0.000189496	TTR	Transthyretin
P01024	4.12836e-08	C3	Complement C3
P01876	6.93317e-08	IGHA1	Ig alpha-1 chain C region
Q86YP4	0.00125132	GATAD2A	Transcriptional repressor p66-alpha
P01009	4.5739e-07	SERPINA1	Alpha-1-antitrypsin
P01860	3.50434e-05	IGHG3	Ig gamma-3 chain C region
P0CG05	0.000254227	IGLC2	Ig lambda-2 chain C regions
P01591	0.000399464	IGJ;JCHAIN	Immunoglobulin J chain
P02647	4.59952e-08	APOA1	Apolipoprotein A-I
Q99880	2.71894e-18	HIST1H2BL	Histone H2B type 1-L
P0DJI8.P02735	0.00105649	SAA1	Serum amyloid A-1 protein
P02652	1.08349e-09	APOA2	Apolipoprotein A-II

## Sheet: Proteomics plasma
Supplemental Table 1: Differential expressed proteins in plasma due to hemolysis
Uniprot Accesion	adj.P.Val	GeneSymbol	ProteinName
P00915	6.90508e-30	CA1	Carbonic anhydrase 1
P32119	1.06411e-28	PRDX2	Peroxiredoxin-2
P68871	2.54468e-23	HBB	Hemoglobin subunit beta
P00918	1.30038e-19	CA2	Carbonic anhydrase 2
P69905	4.04754e-17	HBA1;HBA2	Hemoglobin subunit alpha
P06703	4.22515e-16	S100A6	Protein S100-A6
P04040	3.45118e-14	CAT	Catalase
P07738	3.85239e-10	BPGM	Bisphosphoglycerate mutase
P02042	1.06021e-09	HBD	Hemoglobin subunit delta
P13798	5.55012e-08	APEH	Acylamino-acid-releasing enzyme
Q06830	9.84013e-07	PRDX1	Peroxiredoxin-1
P00441	0.000157007	SOD1	Superoxide dismutase [Cu-Zn]
P00740	0.000526298	F9	Coagulation factor IX
P13716	0.00501485	ALAD	Delta-aminolevulinic acid dehydratase
P07225	0.00640138	PROS1	Vitamin K-dependent protein S
Q99497	0.00644716	PARK7	Protein DJ-1
P00742	0.00644716	F10	Coagulation factor X
P00734	0.011521	F2	Prothrombin
P35555	0.0175639	FBN1	Fibrillin-1
P19320	0.0213172	VCAM1	Vascular cell adhesion protein 1
O14818	0.0213172	PSMA7	Proteasome subunit alpha type-7
P02753	0.0232397	RBP4	Retinol-binding protein 4
P25786	0.0345983	PSMA1	Proteasome subunit alpha type-1
O15394	0.0478115	NCAM2	Neural cell adhesion molecule 2

## Sheet: Proteomics Serum
Supplemental Table 1: Differential expressed proteins in plasma due to hemolysis
Uniprot Accesion	adj.P.Val	GeneSymbol	ProteinName
P00918	4.2479e-45	CA2	Carbonic anhydrase 2
P32119	3.42791e-37	PRDX2	Peroxiredoxin-2
P00915	1.41779e-31	CA1	Carbonic anhydrase 1
P00441	2.06837e-26	SOD1	Superoxide dismutase [Cu-Zn]
P68871	1.15098e-23	HBB	Hemoglobin subunit beta
P69905	4.16396e-22	HBA1;HBA2	Hemoglobin subunit alpha
P04040	2.33448e-21	CAT	Catalase
P06703	4.01662e-12	S100A6	Protein S100-A6
P02042	3.55708e-09	HBD	Hemoglobin subunit delta
P60174	1.29086e-08	TPI1	Triosephosphate isomerase
P04075	0.00022293	ALDOA	Fructose-bisphosphate aldolase A
P07195	0.000765257	LDHB	L-lactate dehydrogenase B chain
Q14126	0.00711155	DSG2	Desmoglein-2
Q8NDG6	0.0280979	TDRD9	Putative ATP-dependent RNA helicase TDRD9
Q6UX71	0.0280979	PLXDC2	Plexin domain-containing protein 2

## Sheet: Structural lipidomics plasma
Supplemental Table 1: Differentially expressed lipids in plasma
structrual.lipid	adj.P.Val
PA.LPA_16.0	1.18862e-09
PA.LPA_18.0	1.18862e-09
PC.O.30.2	0.000988709
PA.LPA_18.1	0.0058261
PA.LPA_14.0	0.0215955
AC.18.2	0.0462762
PA.LPA_18.2	0.0462762

## Sheet: Structural lipidomics Serum
Supplemental Table 1: Differentially expressed lipids in Serum
structrual.lipid	adj.P.Val
AC.14.1	0.00553429
TAG.60.12.NH4	0.0097934
AC.14.2	0.00502661
TAG.56.9.NH4	0.00502661
TAG.58.10.NH4	0.0376605
TAG.56.10.NH4	0.0097934
AC.18.1	0.0229404
TAG.58.11.NH4	0.0262829
TAG.56.8.NH4	0.0308519
PG.18.1.22.2	0.0390355
TAG.56.7.NH4	0.0414658
DAG.34.1.NH4	0.0247741
TAG.56.1.NH4	0.0311394
PE.36.1	0.0390355
TAG.54.1.NH4	0.0229404
TAG.42.2.NH4	0.0376605
TAG.40.2.NH4	0.0323628
PE.36.0	0.0229404
TAG.38.0.NH4	0.0414658
TAG.44.2.NH4	0.00502661
TAG.42.0.NH4	0.00690215
PA.LPA_14.0	0.00142463
TAG.40.1.NH4	0.0203822
PA.LPA_18.0	3.48534e-08
PA.LPA_16.0	4.411e-09

## Sheet: Metabolomics plasma
Supplemental Table 1: Differentially expressed metabolites in Plasma
Meta_ID	adj.P.Val	Meta_name
BM000176	1.08109e-12	CYSTINE
BM000349	1.7373e-09	LEUCINE
BM000472	3.79588e-08	PURINE
BM000449	4.57744e-08	PHENYLALANINE
BM000467	1.23463e-07	PROLINE
BM000272	1.0347e-06	GLUTATHIONE
BM000252	1.0347e-06	GAMMA-GLUTATHIONE-CYSTEINE
BM000491	1.0347e-06	S-ADENOSYL-L-HOMOCYSTEINE
BM000344	1.08662e-06	LACTATE
BM000504	3.07697e-06	SPERMIDINE
BM000035	3.75882e-06	2-METHYLBUTYROYLCARNITINE
BM000174	7.02622e-06	CYSTEINE
BM000025	8.70414e-05	2-HYDROXY-2-METHYLBUTANEDIOIC ACID
BM000273	0.000124424	GLUTATHIONE DISULFIDE
BM000162	0.000537826	CMP
BM000243	0.000569224	FRUCTOSE-1,6-BISPHOSPHATE
BM000407	0.000569224	N-CARBAMOYL-L-ASPARTATE
BM000481	0.00071803	QUINOLINATE
BM000102	0.000762584	ADENINE
BM000144	0.000902185	CAPRIC ACID
BM000478	0.000968347	PYRUVATE
BM000042	0.00131755	2-PYRROLIDINONE
BM000393	0.00200422	N-ACETYL-GLUTAMATE
BM000182	0.00200422	DCMP
BM000237	0.00239111	FAD
BM000536	0.00306077	TIGLYLCARNITINE
BM000276	0.00333922	GLYCERATE
BM000532	0.00343836	THREONIC ACID
BM000396	0.00396219	N-ACETYL-NEURAMINIC ACID
BM000673	0.00413166	SUBERIC ACID
BM000413	0.00446828	NONANEDIOIC ACID
BM000385	0.00473411	N6-ACETYL-L-LYSINE
BM000139	0.00544718	BIOTIN
BM000493	0.00570299	S-ADENOSYL-L-METHIONINE
BM000169	0.00572079	CYCLIC ADP-RIBOSE
BM000074	0.00627687	5-HYDROXYLYSINE
BM000682	0.00633659	CORTISOL
BM000507	0.00776979	SPHINGOSINE-1-PHOSPHATE
BM000242	0.00776979	FRUCTOSE
BM000345	0.00848886	LACTOSE
BM000089	0.0105838	9-DECENOYLCARNITINE
BM000368	0.0112639	METHIONINE SULFOXIDE
BM000357	0.0135387	MALATE
BM000295	0.0145159	GUANIDINEPROPIONIC ACID
BM000654	0.0146419	3-HYDROXY-2-METHYLBUTYRIC ACID
BM000356	0.0146419	MALEIC ACID
BM000186	0.0147673	DECENOYLCARNITINE
BM000116	0.015696	AMP
BM000500	0.0173954	S-METHYL-5-THIOADENOSINE
BM000397	0.0193861	N-ACETYLPUTRESCINE
BM000372	0.0193861	METHYLMALONYLCARNITINE
BM000077	0.0260002	5-METHYL-THF
BM000616	0.0261461	INDOLEACETIC ACID
BM000250	0.0261461	GAMMA-GLUCYS
BM000285	0.0261461	GLYCOCHOLIC ACID
BM000283	0.0261461	GLYCERYLPHOSPHORYLETHANOLAMINE
BM000071	0.0261461	5-AMINO-3-OXOHEXANOIC ACID
BM000050	0.0261461	3-HYDROXYISAVALERYLCARNITINE
BM000165	0.0261461	CREATINE
BM000423	0.0261461	OCTANOYLCARNITINE
BM000424	0.026715	OCTENOYLCARNITINE
BM000100	0.0285351	ACETYLPHOSPHATE
BM000323	0.0327043	HYPOXANTHINE
BM000495	0.0327043	SARCOSINE
BM000551	0.0328771	URACIL
BM000300	0.0328771	HEPTANOYLCARNITINE
BM000282	0.0328771	GLYCEROPHOSPHOCHOLINE
BM000294	0.034812	GUANIDINEBUTYRIC ACID
BM000219	0.0350159	DODECANEDIOIC ACID
BM000220	0.0384273	DODECANOIC ACID
BM000464	0.0390796	PIPECOLIC ACID
BM000657	0.0390796	2-FUROIC ACID
BM000475	0.0400668	PYRIDOXINE
BM000454	0.0427762	PHOSHPATIDYLGLYCEROL
BM000521	0.0430315	TAURINE
BM000555	0.0482333	URIDINE

## Sheet: Metabolomics Serum
Supplemental Table 1: Differentially expressed metabolites in Serum
Meta_ID	logFC	adj.P.Val	Meta_name		0.378512
BM000400	3.07159	9.25293e-25	NAD+
BM000410	1.45692	1.41589e-20	NICOTINAMIDE
BM000491	0.733376	2.14657e-14	S-ADENOSYL-L-HOMOCYSTEINE
BM000393	-0.762724	3.51441e-12	N-ACETYL-GLUTAMATE
BM000401	2.76198	1.14547e-11	NADH
BM000492	-0.527102	8.91517e-10	S-ADENOSYL-L-METHIONINAMINE
BM000296	-0.631492	6.5295e-08	GUANIDINOSUCCINIC ACID
BM000616	-1.3763	1.38453e-07	INDOLEACETIC ACID
BM000176	-0.47742	1.79616e-07	CYSTINE
BM000273	1.75262	1.21068e-06	GLUTATHIONE DISULFIDE
BM000505	-1.0844	2.69536e-06	SPERMINE
BM000294	-0.921415	3.9309e-06	GUANIDINEBUTYRIC ACID
BM000513	-0.936452	5.83582e-06	SUCCINATE
BM000025	-0.461907	5.83582e-06	2-HYDROXY-2-METHYLBUTANEDIOIC ACID
BM000493	-0.461713	5.98066e-06	S-ADENOSYL-L-METHIONINE
BM000285	-1.87284	1.09178e-05	GLYCOCHOLIC ACID
BM000535	-0.903746	1.09178e-05	THYMINE
BM000124	-0.4795	1.74029e-05	ARGININE
BM000357	-0.515727	2.06487e-05	MALATE
BM000504	0.724581	3.04293e-05	SPERMIDINE
BM000077	-0.95649	5.10301e-05	5-METHYL-THF
BM000371	-0.734767	5.10301e-05	METHYLMALONIC ACID
BM000480	-0.273117	5.10301e-05	QUINIC ACID
BM000484	-1.03915	8.45184e-05	RIBOFLAVIN
BM000500	-0.443232	8.45184e-05	S-METHYL-5-THIOADENOSINE
BM000074	-0.500967	9.34043e-05	5-HYDROXYLYSINE
BM000174	-0.341652	0.000123244	CYSTEINE
BM000470	-0.728989	0.000125434	PROPIONYLCHOLINE
BM000298	-1.57558	0.000220677	GUANOSINE
BM000456	2.31929	0.000220677	PHOSPHOENOLPYRUVATE
BM000164	-0.373831	0.000242794	COUMARIC ACID
BM000472	-0.28354	0.000395381	PURINE
BM000356	-0.510372	0.000563982	MALEIC ACID
BM000544	-0.360177	0.000749868	TYROSINE
BM000152	-1.20454	0.000756193	CHENODEOXYGLYCOCHOLATE
BM000286	-1.11294	0.000836218	GLYCODEOXYCHOLATE
BM000433	-0.393753	0.000863968	OROTATE
BM000525	0.705262	0.000896187	TETRADECADIENCARNITINE
BM000006	0.687919	0.0013802	1,5-ANHYDROHEXITOL;1,5-ANHYDROHEXITOL, 4TMS DERIVATIVE
BM000467	-0.334301	0.0019899	PROLINE
BM000320	-0.967375	0.00239736	HYDROXYPHENYLACETIC ACID
BM000136	-0.313259	0.00239736	BETAINE
BM000449	-0.290369	0.00269266	PHENYLALANINE
BM000327	-0.332207	0.00295076	IMIDAZOLEACETIC ACID
BM000527	0.64037	0.00334293	TETRADECENOYLCARNITINE
BM000389	-0.326365	0.00334293	N-ACETYLASPARTIC ACID
BM000244	-0.763782	0.00339558	FRUCTOSE-6-PHOSPHATE
BM000391	-0.367936	0.00355921	N-ACETYL-GLUCOSAMINE
BM000029	-0.333363	0.00422985	2-HYDROXYGLUTARATE
BM000109	-0.347878	0.00422985	A-KETOGLUTARATE
BM000213	-0.392562	0.00589381	DIMETHYLGLYCINE
BM000126	-0.280466	0.00602827	ASPARAGINE
BM000349	-0.352664	0.00602827	LEUCINE
BM000557	0.490732	0.00602827	VACCENYLCARNITINE
BM000022	-0.38273	0.00610739	2-DEHYDRO-D-GLUCONATE
BM000146	-0.276856	0.00669752	CARNITINE
BM000454	-0.44447	0.00703726	PHOSHPATIDYLGLYCEROL
BM000008	-0.241322	0.00857245	1-METHYLADENOSINE
BM000516	-0.291337	0.00874745	SUCCINYLADENOSINE
BM000252	0.845516	0.00914064	GAMMA-GLUTATHIONE-CYSTEINE
BM000322	-0.424871	0.00974583	HYDROXYPROLINE
BM000403	-0.314048	0.0117334	NADP+
BM000566	-0.513464	0.0118529	3-INDOLE-ACETIC ACID
BM000643	-0.199035	0.0118529	1-METHYL ADENINE
BM000396	-0.270654	0.0118529	N-ACETYL-NEURAMINIC ACID
BM000036	-0.229481	0.0119894	2-METHYLGLUTARIC ACID
BM000154	-0.340019	0.0120902	CHOLESTERYL SULFATE
BM000385	-0.233563	0.0123503	N6-ACETYL-L-LYSINE
BM000354	-0.289992	0.012517	1-HEXADECANOYL-SN-GLYCERO-3-PHOSPHOCHOLINE;LPC;LPC (16:0/0:0)
BM000269	-0.257174	0.012517	GLUTAMINE
BM000251	-0.300823	0.0165254	GAMMA-GLU-GLN
BM000481	-0.197345	0.0173813	QUINOLINATE
BM000156	-0.23777	0.0184741	CHOLINE
BM000262	-0.675081	0.0184741	GLUCOSE-1,6-BISPHOSPHATE
BM000369	-0.240254	0.0184741	METHYLGUANINE
BM000245	-0.480731	0.0186457	FUMARATE
BM000243	-0.297357	0.0188257	FRUCTOSE-1,6-BISPHOSPHATE
BM000260	-0.283549	0.0226022	GLUCOSAMINE
BM000489	-0.246047	0.023111	S1P
BM000478	-0.252071	0.023111	PYRUVATE
BM000071	-0.537423	0.0232814	5-AMINO-3-OXOHEXANOIC ACID
BM000351	0.653758	0.0252905	LINOLEIC ACID
BM000475	-0.957556	0.026592	PYRIDOXINE
BM000217	0.649204	0.0272918	DOCOSATRIYNOIC ACID
BM000306	-0.230153	0.0277153	HISTIDINE
BM000215	0.575941	0.0285262	DOCOSAHEXAENOIC ACID
BM000429	0.672224	0.0288401	OLEIC ACID
BM000270	-0.700294	0.0295096	GLUTARIC ACID
BM000265	-0.316593	0.0295096	GLUCOSYLGALACTOSYLHYDROXYLYSINE
BM000178	-0.189891	0.0295096	CYTOSINE
BM000344	-0.275703	0.0295096	LACTATE
BM000345	-0.59113	0.0295096	LACTOSE
BM000432	-0.248274	0.0295096	ORNITHINE
BM000166	-0.220687	0.0304261	CREATININE
BM000138	-0.448925	0.0353131	BILIRUBIN
BM000423	0.513662	0.0353896	OCTANOYLCARNITINE
BM000199	-1.02485	0.0374843	D-ERYTHROSE-4-PHOSPHATE
BM000681	0.500011	0.0389627	ALPHA-KETOISOVALERIC ACID
BM000379	-0.582351	0.0393584	MYO-INOSITOL
BM000144	-0.550395	0.0395462	CAPRIC ACID
BM000442	0.782032	0.0395462	PALMITOLEIC ACID
BM000237	-0.265477	0.0395462	FAD
BM000096	-0.212011	0.0403498	ACETYLCARNITINE
BM000110	-0.275336	0.0403498	ALANINE
BM000105	-0.464706	0.0416394	ADIPATE
BM000543	-0.306264	0.0417187	TRYPTOPHAN
BM000341	-0.27058	0.0417187	ISOLEUCINE
BM000315	0.322045	0.0425994	HYDROXY-HEXADECANOIC ACID
BM000045	-0.373464	0.0432656	3-FORMYL INDOLE
BM000383	0.50336	0.0440036	MYRISTOYLCARNITINE
BM000434	-0.333605	0.0450068	OROTIDINE-5-PHOSPHATE
BM000387	-0.372134	0.0469304	N-ACETYLARGININE
BM000367	-0.227168	0.0474532	METHIONINE
BM000312	-0.508778	0.0490824	HOMOSERINE
